# Supplementary material for: Exogenous Administration of Low-Dose Lipopolysaccharide Potentiates Liver Fibrosis in a Choline-Deficient l-Amino-Acid-Defined Diet-Induced Murine Steatohepatitis Model
Source: PubMed Central journal article supplement (PMC6600174; doi:10.3390/ijms20112724), 2019-06-03
Supplement: ijms-20-02724-s001.pdf [file ijms-20-02724-s001.pdf]

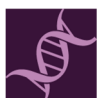

**Supplementary Table1. List of primers used in q-PCR**

| <b>Gene</b>          | <b>Sense (5'-3')</b>  | <b>Antisense (5'-3')</b> |
|----------------------|-----------------------|--------------------------|
| <b><i>Lbp</i></b>    | TCGTGGGCAGTACGAGTTTC  | AAGAGATTCAGCAGCCACCC     |
| <b><i>Cd14</i></b>   | GTCAGGAACTCTGGCTTTGC  | TGGCTTTTACCCACTGAACC     |
| <b><i>Srebf1</i></b> | GATCAAAGAGGAGCCAGTGC  | TAGATGGTGGCTGCTGAGTG     |
| <b><i>Fas</i></b>    | TGGGTTCTAGCCAGCAGAGT  | ACCACCAGAGACCGTTATGC     |
| <b><i>Acc1</i></b>   | GCCTCTTCCTGACAAACGAG  | TGACTGCCGAAACATCTCTG     |
| <b><i>Ppara</i></b>  | GAGGGTTGAGCTCAGTCAGG  | GGTCACCTACGAGTGGCATT     |
| <b><i>Pparg</i></b>  | CTGTGAGACCAACAGCCTGA  | AATGCGAGTGGTCTTCCATC     |
| <b><i>Tnfa</i></b>   | TTCTATGGCCCAGACCCTCA  | TGGTTTGCTACGACGTGGG      |
| <b><i>Il1b</i></b>   | GCCCATCCTCTGTGACTCAT  | AGGCCACAGGTATTTTGTCTG    |
| <b><i>Il6</i></b>    | AGTTGCCTTCTTGGGACTGA  | TCCACGATTTCCCAGAGAAC     |
| <b><i>Acta2</i></b>  | CTGACAGAGGCACCACTGAA  | CATCTCCAGAGTCCAGCACA     |
| <b><i>Col1a1</i></b> | GAGCGGAGAGTACTGGATCG  | GCTTCTTTTCCTTGGGGTTC     |
| <b><i>Tgfb1</i></b>  | TTGCTTCAGCTCCACAGA GA | TGGTTGTAGAGGGCAAGGAC     |
| <b><i>Gapdh</i></b>  | CCACCCAGAAGACTGTGGAT  | CACATTGGGGGTAGGAACAC     |
